# Supplementary material for: Comparing Survival Extrapolation within All-Cause and Relative Survival Frameworks by Standard Parametric Models and Flexible Parametric Spline Models Using the Swedish Cancer Registry
Source: PubMed Central journal article supplement (PMC10988990; doi:10.1177/0272989x241227230), 2024-02-05

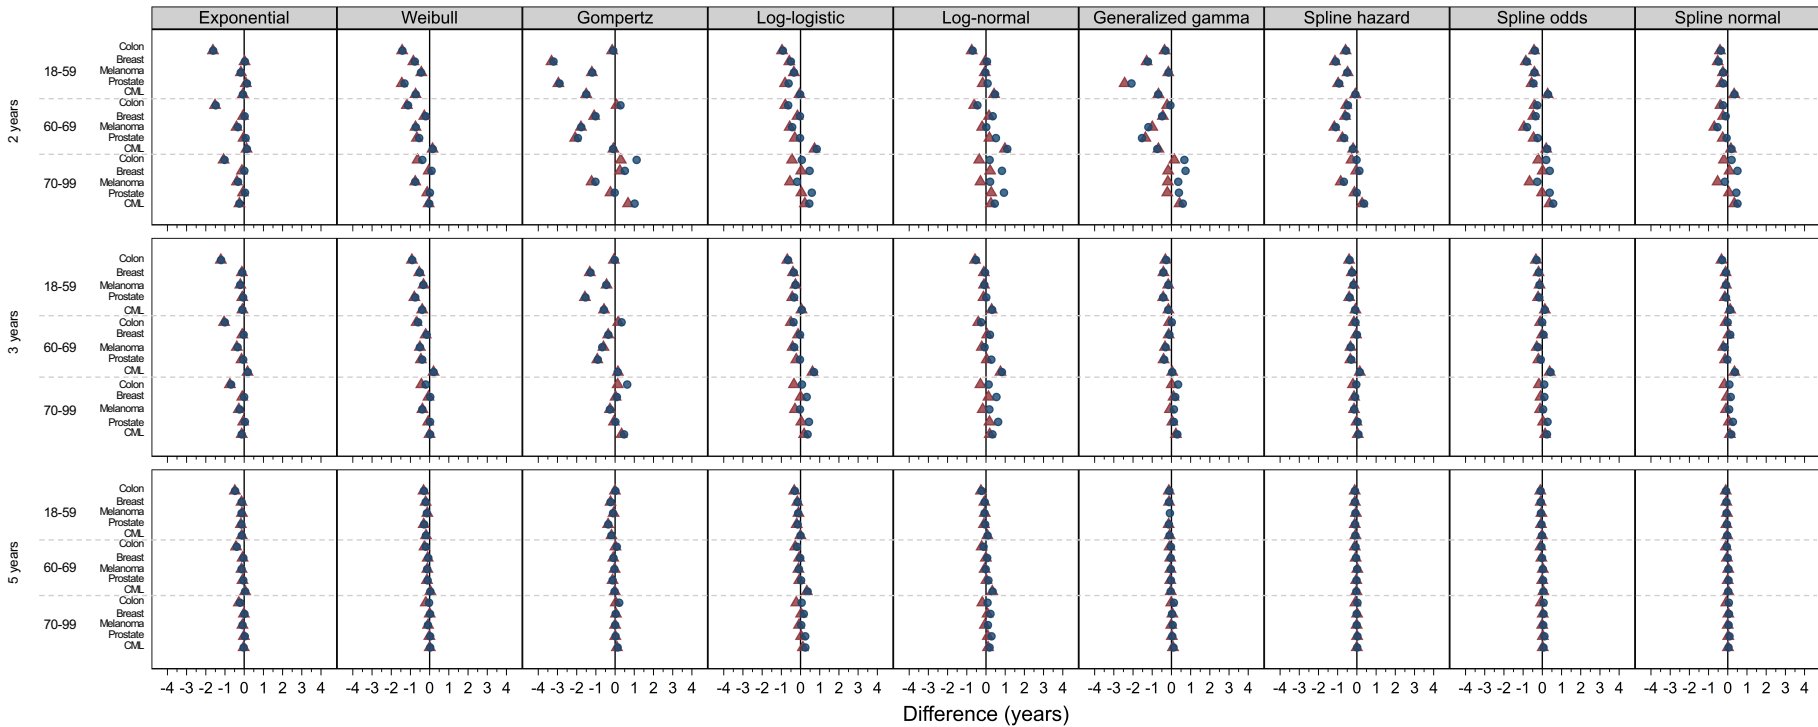

Figure A1. Difference in 10-year restricted mean survival time (RMST) by cancer site, age group, survival framework, model, and follow-up time used for extrapolation. The 10-year observed RMST (years) was the area under the Kaplan-Meier survival curve. The extrapolated values were retrieved from models fitted to each cohort with 2, 3 and 5 years of follow-up data, and extrapolated to 10 years. Difference (years) was calculated as extrapolated minus observed.

● All-cause survival  
▲ Relative survival

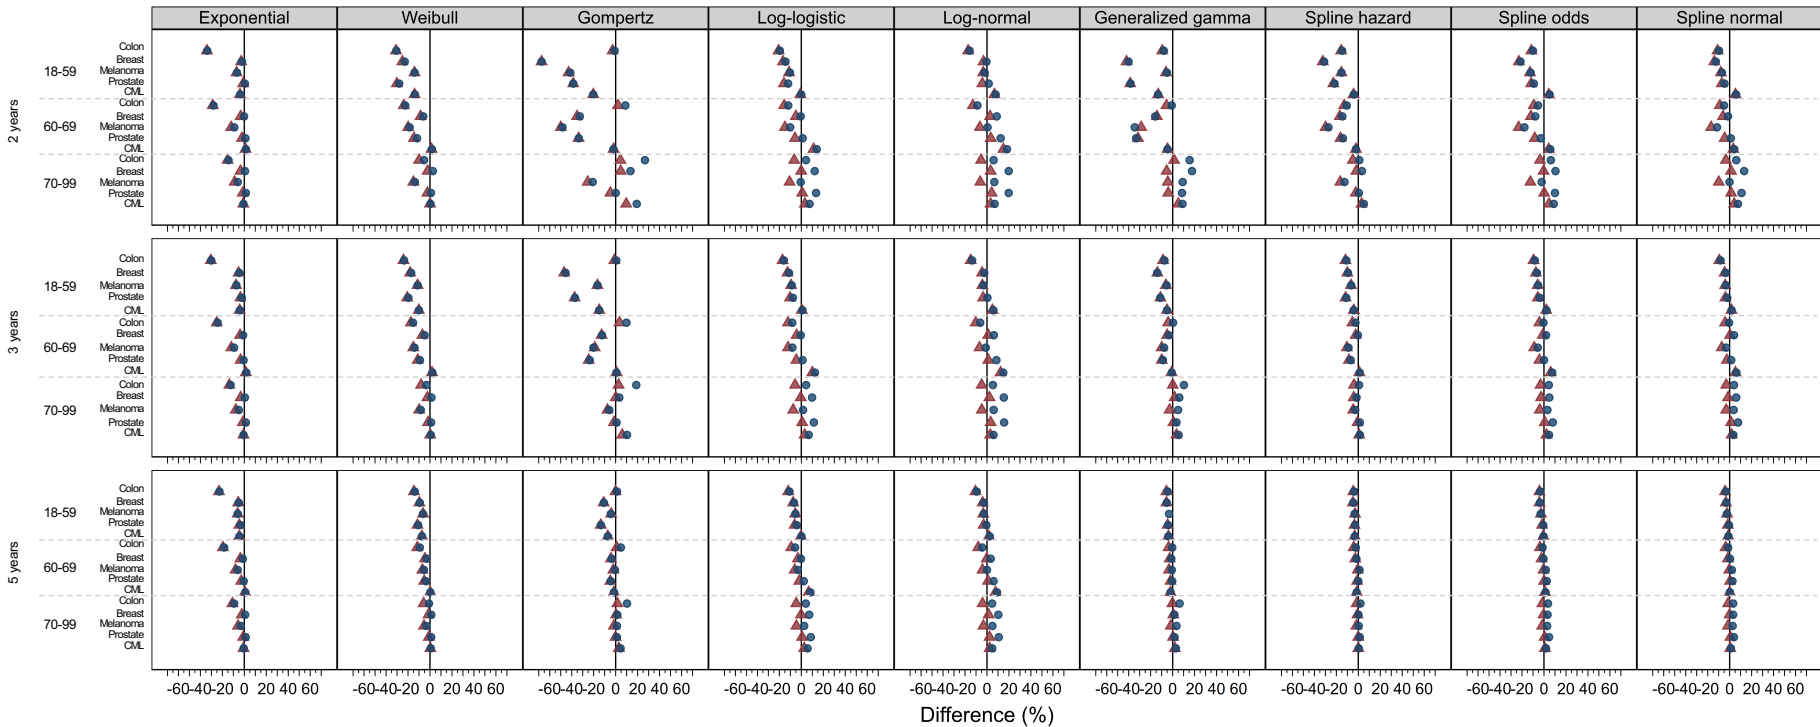

Figure A2. Difference in survival proportion at 10 years by cancer site, age group, survival framework, model, and follow-up time used for extrapolation. The observed values were the Kaplan-Meier survival estimates at 10 years. The extrapolated values were retrieved from models fitted to each cohort with 2, 3 and 5 years of follow-up data, and extrapolated to 10 years. Difference (%) was calculated as extrapolated minus observed.

● All-cause survival  
 ▲ Relative survival

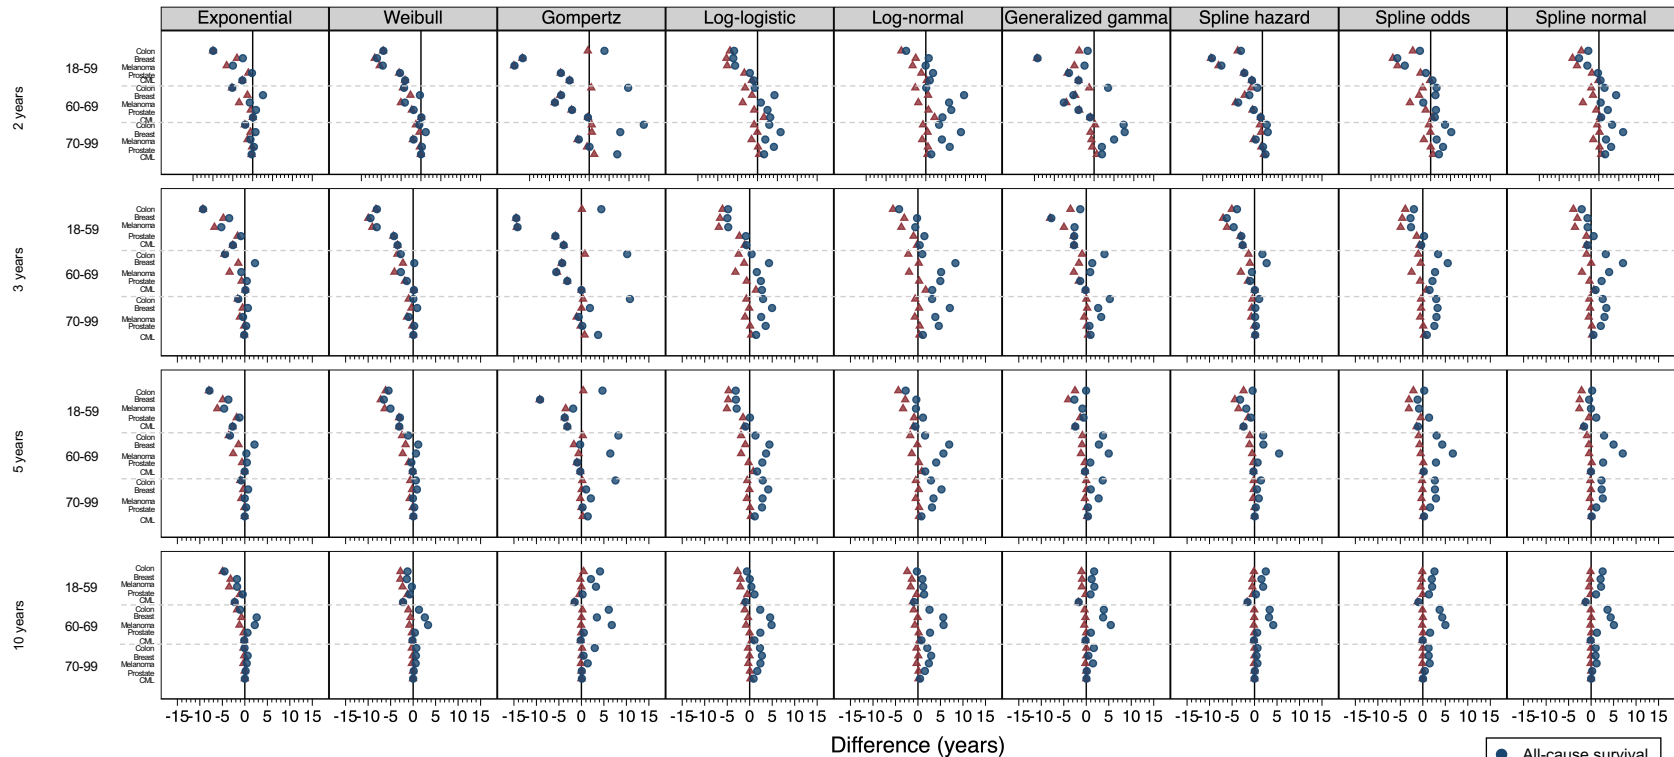

Figure A3. Difference in life expectancy (LE) or 40-year restricted mean survival time (RMST) by cancer site, age group, model, and follow-up time used for extrapolation. The LE or 40-year observed RMST (years) was the area under the Kaplan-Meier survival curve. The extrapolated values were retrieved from models fitted to each cohort with 2, 3, 5, and 10 years of follow-up data, and extrapolated to lifetime or 40 years. Difference (years) was calculated as extrapolated minus observed.

● All-cause survival  
▲ Relative survival

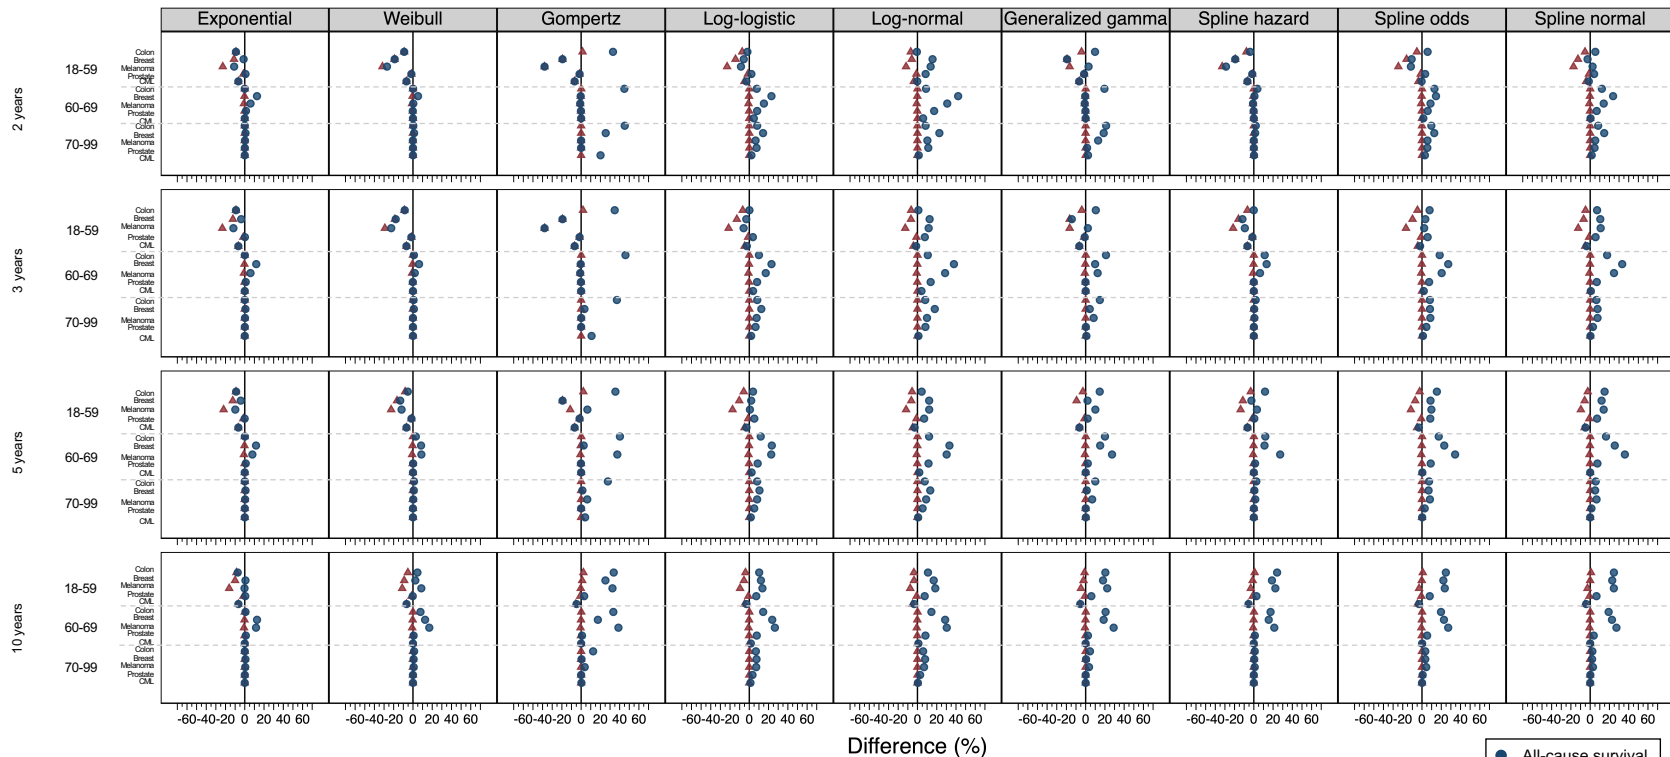

Figure A4. Difference in survival proportion at 40 years by cancer site, age group, model, and follow-up time used for extrapolation. The observed values were the Kaplan-Meier survival estimates at lifetime or 40 years. The extrapolated values were retrieved from models fitted to each cohort with 2, 3, 5, and 10 years of follow-up data, and extrapolated to lifetime or 40 years. Difference (%) was calculated as extrapolated minus observed.

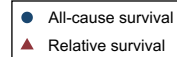

Supplement: sj-pdf-1-mdm-10.1177_0272989X241227230.pdf [file sj-pdf-1-mdm-10.1177_0272989X241227230.pdf]
