# Supplementary material for: Comparing Survival Extrapolation within All-Cause and Relative Survival Frameworks by Standard Parametric Models and Flexible Parametric Spline Models Using the Swedish Cancer Registry
Source: PubMed Central journal article supplement (PMC10988990; doi:10.1177/0272989x241227230), 2024-02-05
Supplement: sj-pdf-2-mdm-10.1177_0272989X241227230.pdf [file sj-pdf-2-mdm-10.1177_0272989X241227230.pdf]

Table B1. Difference in 10-year restricted mean survival time (RMST) by cancer site, age group, survival framework, model, and follow-up time used for extrapolation. The 10-year observed RMST (years) was the area under the Kaplan-Meier survival curve. The extrapolated values were retrieved from models fitted to each cohort with 2, 3 and 5 years of follow-up data, and extrapolated to 10 years. Difference (years) was calculated as extrapolated minus observed. Bold numbers are values mentioned in the main texts.

| Age group                     | Colon |              |       |       |       |       | Breast       |              |       |       |       |       | Melanoma |       |              |              |       |       | Prostate |       |       |       |       |       | CML   |       |       |       |       |       |
|-------------------------------|-------|--------------|-------|-------|-------|-------|--------------|--------------|-------|-------|-------|-------|----------|-------|--------------|--------------|-------|-------|----------|-------|-------|-------|-------|-------|-------|-------|-------|-------|-------|-------|
|                               | 18-59 |              | 60-69 |       | 70-99 |       | 18-59        |              | 60-69 |       | 70-99 |       | 18-59    |       | 60-69        |              | 70-99 |       | 18-59    |       | 60-69 |       | 70-99 |       | 18-59 |       | 60-69 |       | 70-99 |       |
| Survival framework            | AS    | RS           | AS    | RS    | AS    | RS    | AS           | RS           | AS    | RS    | AS    | RS    | AS       | RS    | AS           | RS           | AS    | RS    | AS       | RS    | AS    | RS    | AS    | RS    | AS    | RS    | AS    | RS    | AS    | RS    |
| 10-year observed RMST (years) | 5.59  |              | 5.19  |       | 4.05  |       | 8.10         |              | 7.82  |       | 5.75  |       | 8.70     |       | 7.63         |              | 5.53  |       | 6.35     |       | 6.10  |       | 4.47  |       | 4.71  |       | 3.21  |       | 1.88  |       |
| Extrapolation from 2 years    |       |              |       |       |       |       |              |              |       |       |       |       |          |       |              |              |       |       |          |       |       |       |       |       |       |       |       |       |       |       |
| Exponential                   | -1.62 | -1.63        | -1.49 | -1.52 | -1.02 | -1.07 | 0.04         | 0.02         | 0.02  | -0.06 | 0.01  | -0.12 | -0.18    | -0.17 | -0.33        | -0.40        | -0.32 | -0.38 | 0.14     | 0.08  | 0.07  | -0.04 | 0.04  | -0.06 | -0.07 | -0.07 | 0.14  | 0.12  | -0.25 | -0.25 |
| Weibull                       | -1.42 | -1.43        | -1.13 | -1.19 | -0.38 | -0.63 | -0.77        | -0.85        | -0.21 | -0.28 | 0.10  | -0.05 | -0.45    | -0.43 | -0.72        | -0.74        | -0.75 | -0.75 | -1.31    | -1.45 | -0.54 | -0.66 | 0.01  | -0.13 | -0.72 | -0.73 | 0.16  | 0.15  | -0.02 | -0.05 |
| Gompertz                      | -0.10 | -0.15        | 0.28  | 0.07  | 1.12  | 0.30  | -3.21        | -3.31        | -1.02 | -1.09 | 0.51  | 0.25  | -1.19    | -1.21 | -1.76        | -1.78        | -1.02 | -1.23 | -2.89    | -2.95 | -1.94 | -2.08 | -0.02 | -0.24 | -1.50 | -1.50 | -0.10 | -0.09 | 1.02  | 0.67  |
| Log-logistic                  | -0.92 | -0.97        | -0.64 | -0.80 | 0.07  | -0.44 | -0.50        | -0.59        | -0.03 | -0.16 | 0.47  | 0.04  | -0.34    | -0.35 | -0.44        | -0.57        | -0.18 | -0.55 | -0.62    | -0.81 | -0.03 | -0.30 | 0.59  | 0.04  | -0.02 | -0.06 | 0.84  | 0.73  | 0.45  | 0.23  |
| Log-normal                    | -0.70 | -0.74        | -0.45 | -0.62 | 0.19  | -0.35 | 0.05         | -0.05        | 0.35  | 0.16  | 0.83  | 0.21  | -0.03    | -0.06 | 0.01         | -0.20        | 0.21  | -0.29 | 0.09     | -0.17 | 0.52  | 0.18  | 0.94  | 0.27  | 0.47  | 0.42  | 1.11  | 0.99  | 0.46  | 0.26  |
| Generalized gamma             | -0.31 | -0.36        | -0.05 | -0.22 | 0.67  | 0.15  | -1.23        | -1.29        | -0.48 | -0.45 | 0.73  | -0.17 | -0.15    | -0.16 | -1.20        | -1.00        | 0.35  | -0.19 | -2.08    | -2.44 | -1.53 | -1.36 | 0.39  | -0.22 | -0.69 | -0.68 | -0.74 | -0.68 | 0.59  | 0.42  |
| Spline hazard                 | -0.56 | -0.59        | -0.47 | -0.55 | -0.02 | -0.28 | <b>-1.10</b> | <b>-1.14</b> | -0.55 | -0.62 | 0.13  | -0.04 | -0.50    | -0.49 | <b>-1.10</b> | <b>-1.17</b> | -0.68 | -0.84 | -0.92    | -0.98 | -0.66 | -0.76 | -0.01 | -0.13 | -0.08 | -0.08 | -0.21 | -0.20 | 0.37  | 0.27  |
| Spline odds                   | -0.39 | -0.43        | -0.27 | -0.41 | 0.20  | -0.21 | -0.81        | -0.86        | -0.35 | -0.47 | 0.38  | 0.02  | -0.41    | -0.41 | -0.80        | -0.96        | -0.26 | -0.67 | -0.46    | -0.56 | -0.25 | -0.46 | 0.38  | -0.02 | 0.30  | 0.28  | 0.25  | 0.20  | 0.57  | 0.37  |
| Spline normal                 | -0.36 | -0.41        | -0.25 | -0.38 | 0.20  | -0.20 | -0.48        | -0.53        | -0.11 | -0.25 | 0.51  | 0.09  | -0.24    | -0.25 | -0.54        | -0.70        | -0.15 | -0.53 | -0.24    | -0.33 | -0.06 | -0.26 | 0.44  | 0.06  | 0.35  | 0.33  | 0.19  | 0.16  | 0.50  | 0.34  |
| Extrapolation from 3 years    |       |              |       |       |       |       |              |              |       |       |       |       |          |       |              |              |       |       |          |       |       |       |       |       |       |       |       |       |       |       |
| Exponential                   | -1.20 | -1.22        | -1.01 | -1.05 | -0.68 | -0.74 | -0.10        | -0.12        | -0.03 | -0.10 | 0.00  | -0.10 | -0.21    | -0.20 | -0.34        | -0.39        | -0.24 | -0.28 | -0.06    | -0.10 | -0.05 | -0.14 | 0.04  | -0.05 | -0.09 | -0.09 | 0.19  | 0.17  | -0.13 | -0.13 |
| Weibull                       | -0.91 | -0.93        | -0.60 | -0.68 | -0.21 | -0.43 | -0.52        | -0.54        | -0.15 | -0.21 | 0.03  | -0.06 | -0.33    | -0.32 | -0.51        | -0.51        | -0.38 | -0.38 | -0.75    | -0.80 | -0.39 | -0.45 | 0.02  | -0.07 | -0.39 | -0.39 | 0.21  | 0.20  | 0.02  | 0.00  |
| Gompertz                      | -0.02 | -0.07        | 0.34  | 0.16  | 0.63  | 0.13  | -1.28        | -1.32        | -0.35 | -0.36 | 0.09  | 0.03  | -0.46    | -0.45 | -0.67        | -0.61        | -0.27 | -0.27 | -1.54    | -1.57 | -0.90 | -0.93 | 0.02  | -0.06 | -0.59 | -0.58 | 0.14  | 0.15  | 0.47  | 0.34  |
| Log-logistic                  | -0.65 | -0.69        | -0.37 | -0.50 | 0.07  | -0.35 | -0.35        | -0.39        | -0.03 | -0.13 | 0.32  | 0.00  | -0.26    | -0.27 | -0.33        | -0.41        | -0.03 | -0.29 | -0.34    | -0.43 | -0.03 | -0.22 | 0.44  | 0.04  | 0.07  | 0.05  | 0.70  | 0.62  | 0.37  | 0.19  |
| Log-normal                    | -0.53 | -0.57        | -0.25 | -0.40 | 0.14  | -0.29 | -0.05        | -0.11        | 0.21  | 0.06  | 0.54  | 0.13  | -0.08    | -0.10 | -0.07        | -0.22        | 0.18  | -0.17 | 0.02     | -0.13 | 0.28  | 0.04  | 0.63  | 0.18  | 0.32  | 0.29  | 0.83  | 0.76  | 0.34  | 0.19  |
| Generalized gamma             | -0.27 | -0.31        | 0.02  | -0.12 | 0.35  | 0.02  | -0.42        | -0.42        | -0.11 | -0.14 | 0.20  | 0.11  | -0.16    | -0.16 | -0.31        | -0.33        | 0.13  | -0.08 | -0.43    | -0.43 | -0.38 | -0.41 | 0.12  | 0.04  | -0.17 | -0.16 | 0.04  | 0.04  | 0.31  | 0.23  |
| Spline hazard                 | -0.38 | -0.41        | -0.07 | -0.15 | -0.03 | -0.20 | -0.25        | -0.27        | 0.00  | -0.04 | -0.09 | -0.15 | -0.18    | -0.17 | -0.32        | -0.33        | -0.14 | -0.15 | -0.38    | -0.40 | -0.29 | -0.34 | 0.04  | -0.02 | -0.09 | -0.08 | 0.15  | 0.15  | 0.08  | 0.05  |
| Spline odds                   | -0.30 | -0.33        | -0.01 | -0.11 | 0.10  | -0.18 | -0.18        | -0.20        | 0.06  | -0.01 | 0.11  | -0.10 | -0.15    | -0.14 | -0.23        | -0.29        | 0.04  | -0.12 | -0.16    | -0.22 | -0.08 | -0.21 | 0.27  | 0.03  | 0.13  | 0.13  | 0.42  | 0.38  | 0.24  | 0.14  |
| Spline normal                 | -0.30 | -0.33        | -0.01 | -0.11 | 0.08  | -0.18 | -0.09        | -0.12        | 0.13  | 0.03  | 0.15  | -0.05 | -0.09    | -0.10 | -0.16        | -0.24        | 0.07  | -0.09 | -0.09    | -0.15 | -0.02 | -0.14 | 0.27  | 0.06  | 0.12  | 0.13  | 0.37  | 0.35  | 0.18  | 0.11  |
| Extrapolation from 5 years    |       |              |       |       |       |       |              |              |       |       |       |       |          |       |              |              |       |       |          |       |       |       |       |       |       |       |       |       |       |       |
| Exponential                   | -0.48 | <b>-0.49</b> | -0.39 | -0.43 | -0.22 | -0.28 | -0.13        | -0.14        | -0.05 | -0.09 | 0.01  | -0.02 | -0.13    | -0.12 | -0.14        | -0.14        | -0.09 | -0.09 | -0.15    | -0.17 | -0.05 | -0.09 | 0.03  | -0.02 | -0.13 | -0.13 | 0.05  | 0.05  | -0.03 | -0.03 |
| Weibull                       | -0.30 | -0.32        | -0.20 | -0.27 | -0.03 | -0.20 | -0.20        | -0.21        | -0.07 | -0.10 | 0.02  | 0.00  | -0.14    | -0.12 | -0.13        | -0.12        | -0.09 | -0.09 | -0.29    | -0.31 | -0.11 | -0.14 | 0.02  | -0.02 | -0.19 | -0.19 | 0.04  | 0.04  | 0.03  | 0.00  |
| Gompertz                      | 0.02  | -0.01        | 0.09  | 0.02  | 0.21  | 0.04  | -0.24        | -0.24        | -0.09 | -0.10 | 0.03  | 0.04  | -0.11    | -0.08 | -0.04        | -0.02        | 0.01  | 0.00  | -0.35    | -0.37 | -0.13 | -0.13 | 0.03  | 0.01  | -0.19 | -0.19 | -0.02 | -0.02 | 0.13  | 0.09  |
| Log-logistic                  | -0.30 | -0.33        | -0.18 | -0.28 | 0.06  | -0.22 | -0.15        | -0.17        | -0.02 | -0.07 | 0.17  | 0.03  | -0.12    | -0.11 | -0.09        | -0.11        | 0.04  | -0.08 | -0.15    | -0.20 | 0.03  | -0.07 | 0.24  | 0.03  | 0.00  | -0.01 | 0.37  | 0.33  | 0.25  | 0.12  |
| Log-normal                    | -0.23 | -0.26        | -0.13 | -0.22 | 0.08  | -0.19 | -0.07        | -0.09        | 0.06  | -0.01 | 0.24  | 0.08  | -0.07    | -0.07 | -0.02        | -0.07        | 0.10  | -0.06 | -0.04    | -0.10 | 0.13  | 0.02  | 0.29  | 0.09  | 0.08  | 0.07  | 0.34  | 0.33  | 0.19  | 0.11  |
| Generalized gamma             | -0.11 | -0.14        | -0.03 | -0.10 | 0.12  | -0.01 | -0.12        | -0.13        | -0.04 | -0.06 | 0.03  | 0.05  | -0.08    | -0.05 | -0.03        | -0.05        | 0.06  | -0.01 | -0.13    | -0.15 | -0.03 | -0.06 | 0.04  | 0.02  | -0.10 | -0.10 | -0.04 | -0.04 | 0.11  | 0.08  |
| Spline hazard                 | -0.10 | -0.11        | -0.07 | -0.11 | 0.03  | -0.08 | -0.10        | -0.10        | -0.05 | -0.06 | -0.01 | 0.01  | -0.08    | -0.05 | 0.01         | 0.02         | -0.01 | -0.01 | -0.09    | -0.11 | -0.02 | -0.03 | 0.03  | 0.01  | -0.08 | -0.08 | -0.03 | -0.02 | 0.01  | 0.00  |
| Spline odds                   | -0.09 | -0.11        | -0.05 | -0.10 | 0.07  | -0.08 | -0.08        | -0.09        | -0.02 | -0.05 | 0.06  | 0.02  | -0.07    | -0.04 | 0.03         | 0.03         | 0.05  | -0.01 | -0.05    | -0.07 | 0.04  | -0.01 | 0.11  | 0.03  | -0.02 | -0.02 | 0.06  | 0.05  | 0.06  | 0.02  |
| Spline normal                 | -0.09 | -0.11        | -0.05 | -0.10 | 0.06  | -0.08 | -0.07        | -0.08        | -0.01 | -0.04 | 0.06  | 0.03  | -0.06    | -0.12 | 0.03         | 0.03         | 0.05  | 0.00  | -0.04    | -0.07 | 0.04  | 0.00  | 0.09  | 0.03  | -0.03 | -0.03 | 0.02  | 0.02  | 0.04  | 0.01  |

AS, all-cause survival; RS, relative survival; RSM, restricted mean survival time; CML, chronic myeloid leukemia.

Table B2. Difference in survival proportion at 10 years by cancer site, age group, survival framework, model, and follow-up time used for extrapolation. The observed values were the Kaplan-Meier survival estimates at 10 years. The extrapolated values were retrieved from models fitted to each cohort with 2, 3 and 5 years of follow-up data, and extrapolated to 10 years. Difference (%) was calculated as extrapolated minus observed. Bold numbers are values mentioned in the main texts.

| Age group                           | Colon  |        |        |        |              |        | Breast        |              |        |        |       |       | Melanoma |        |        |        |        |        | Prostate |        |        |        |             |       | CML    |        |       |       |       |       |
|-------------------------------------|--------|--------|--------|--------|--------------|--------|---------------|--------------|--------|--------|-------|-------|----------|--------|--------|--------|--------|--------|----------|--------|--------|--------|-------------|-------|--------|--------|-------|-------|-------|-------|
|                                     | 18-59  |        | 60-69  |        | 70-99        |        | 18-59         |              | 60-69  |        | 70-99 |       | 18-59    |        | 60-69  |        | 70-99  |        | 18-59    |        | 60-69  |        | 70-99       |       | 18-59  |        | 60-69 |       | 70-99 |       |
|                                     | AS     | RS     | AS     | RS     | AS           | RS     | AS            | RS           | AS     | RS     | AS    | RS    | AS       | RS     | AS     | RS     | AS     | RS     | AS       | RS     | AS     | RS     | AS          | RS    | AS     | RS     | AS    | RS    | AS    | RS    |
| Survival proportion at 10 years (%) | 44.32  |        | 36.51  |        | 18.65        |        | 67.42         |              | 60.42  |        | 28.70 |       | 78.79    |        | 60.51  |        | 28.66  |        | 38.65    |        | 33.74  |        | 13.90       |       | 20.42  |        | 4.64  |       | 1.08  |       |
| Extrapolation from 2 years          |        |        |        |        |              |        |               |              |        |        |       |       |          |        |        |        |        |        |          |        |        |        |             |       |        |        |       |       |       |       |
| Exponential                         | -33.80 | -34.00 | -28.11 | -28.72 | -14.45       | -15.22 | -2.21         | -2.87        | -0.24  | -3.27  | 0.62  | -3.48 | -6.76    | -7.06  | -9.20  | -12.00 | -5.98  | -8.81  | 0.49     | -1.03  | 1.02   | -2.17  | 1.41        | -1.45 | -3.80  | -3.93  | 1.44  | 1.04  | -0.86 | -0.89 |
| Weibull                             | -30.66 | -30.96 | -22.55 | -23.82 | -5.44        | -9.92  | -23.03        | -25.13       | -6.16  | -8.55  | 2.59  | -2.15 | -14.04   | -14.08 | -18.55 | -19.90 | -13.78 | -15.10 | -28.02   | -30.11 | -11.81 | -14.59 | 0.89        | -2.41 | -13.86 | -14.06 | 1.71  | 1.39  | 0.45  | 0.03  |
| Gompertz                            | -0.99  | -2.75  | 8.77   | 2.13   | <b>26.68</b> | 4.30   | <b>-67.42</b> | -67.42       | -32.59 | -35.13 | 13.52 | 4.60  | -41.32   | -42.88 | -48.41 | -49.97 | -20.89 | -25.42 | -38.65   | -38.65 | -33.62 | -33.73 | 0.04        | -4.83 | -20.41 | -20.41 | -1.99 | -1.89 | 19.19 | 9.62  |
| Log-logistic                        | -19.54 | -20.65 | -11.89 | -15.61 | 4.22         | -6.52  | -14.43        | -16.71       | -0.59  | -4.93  | 12.22 | -0.14 | -10.45   | -11.12 | -10.17 | -14.92 | -0.56  | -10.69 | -12.06   | -15.84 | 1.23   | -5.75  | 13.42       | 0.81  | -0.13  | -0.91  | 13.98 | 11.17 | 7.46  | 3.26  |
| Log-normal                          | -15.85 | -17.09 | -8.73  | -12.82 | 6.01         | -5.37  | -0.52         | -3.16        | 8.87   | 2.81   | 19.80 | 3.31  | -2.13    | -3.45  | 0.48   | -6.50  | 6.68   | -6.15  | 1.56     | -4.21  | 12.46  | 3.43   | 19.78       | 4.23  | 7.89   | 6.74   | 18.17 | 14.97 | 6.93  | 3.28  |
| Generalized gamma                   | -8.09  | -9.50  | -0.85  | -5.60  | 15.46        | 1.34   | -40.13        | -41.97       | -15.84 | -14.34 | 17.61 | -5.48 | -5.23    | -6.10  | -34.54 | -28.65 | 9.16   | -4.38  | -38.33   | -38.65 | -33.23 | -31.57 | 8.53        | -4.04 | -13.30 | -13.18 | -4.64 | -4.64 | 8.96  | 5.08  |
| Spline hazard                       | -14.80 | -15.62 | -10.54 | -12.84 | 0.91         | -4.97  | -31.10        | -32.34       | -14.53 | -16.82 | 3.25  | -1.80 | -15.32   | -15.44 | -27.21 | -29.84 | -12.55 | -16.44 | -21.64   | -22.69 | -14.06 | -16.24 | 0.48        | -2.34 | -4.11  | -4.33  | -2.21 | -2.22 | 4.97  | 2.97  |
| Spline odds                         | -10.14 | -11.45 | -5.43  | -9.31  | 6.27         | -3.66  | -21.35        | -22.86       | -7.90  | -11.93 | 10.49 | -0.36 | -12.12   | -12.76 | -17.85 | -23.01 | -2.10  | -12.34 | -9.26    | -11.67 | -2.83  | -8.37  | 9.99        | 0.12  | 5.07   | 4.43   | 5.71  | 4.35  | 8.92  | 4.59  |
| Spline normal                       | -9.69  | -10.97 | -5.16  | -8.95  | 6.03         | -3.48  | -12.60        | -13.97       | -1.48  | -6.02  | 13.21 | 1.24  | -7.03    | -7.99  | -11.54 | -16.84 | -0.12  | -9.91  | -4.75    | -7.11  | 1.02   | -4.51  | 10.84       | 1.37  | 5.87   | 5.29   | 4.16  | 3.29  | 7.62  | 4.15  |
| Extrapolation from 3 years          |        |        |        |        |              |        |               |              |        |        |       |       |          |        |        |        |        |        |          |        |        |        |             |       |        |        |       |       |       |       |
| Exponential                         | -30.21 | -30.47 | -24.28 | -25.13 | -12.52       | -13.62 | -4.61         | -5.22        | -1.11  | -3.83  | 0.49  | -3.28 | -7.27    | -7.56  | -9.36  | -11.77 | -5.06  | -7.74  | -2.29    | -3.57  | -0.70  | -3.47  | 1.34        | -1.36 | -4.09  | -4.19  | 1.72  | 1.34  | -0.74 | -0.79 |
| Weibull                             | -23.64 | -24.14 | -15.47 | -17.40 | -3.31        | -8.11  | -17.14        | -18.07       | -4.90  | -6.96  | 1.38  | -2.36 | -11.22   | -11.34 | -14.09 | -15.24 | -8.42  | -9.88  | -19.67   | -20.71 | -9.17  | -11.14 | 1.00        | -1.78 | -10.10 | -10.18 | 2.11  | 1.82  | 0.67  | 0.21  |
| Gompertz                            | 0.54   | -1.16  | 9.81   | 3.53   | 18.73        | 2.72   | -45.58        | -46.90       | -12.44 | -12.77 | 3.31  | 0.17  | -16.53   | -16.60 | -20.21 | -19.03 | -5.82  | -7.42  | -37.07   | -37.35 | -23.68 | -24.53 | 0.83        | -1.58 | -14.97 | -14.93 | 0.74  | 0.81  | 10.32 | 6.00  |
| Log-logistic                        | -15.95 | -17.10 | -8.25  | -12.11 | 4.31         | -5.70  | -11.28        | -12.64       | -0.55  | -4.27  | 9.77  | -0.60 | -8.73    | -9.32  | -8.14  | -12.08 | 1.55   | -7.42  | -7.66    | -10.24 | 1.15   | -4.57  | 11.44       | 0.78  | 1.01   | 0.42   | 12.32 | 9.99  | 6.70  | 3.03  |
| Log-normal                          | -13.58 | -14.80 | -6.16  | -10.25 | 5.43         | -4.85  | -2.47         | -4.48        | 6.22   | 1.12   | 15.30 | 2.21  | -3.17    | -4.28  | -1.12  | -6.81  | 6.11   | -4.73  | 0.41     | -3.54  | 8.57   | 1.20   | 15.59       | 3.29  | 5.82   | 4.97   | 14.79 | 12.40 | 5.92  | 2.93  |
| Generalized gamma                   | -7.47  | -8.75  | 0.37   | -4.06  | 10.21        | 0.11   | -13.95        | -13.90       | -3.42  | -4.97  | 6.07  | 1.81  | -5.53    | -6.13  | -7.81  | -9.99  | 4.91   | -2.80  | -11.19   | -11.09 | -8.88  | -9.93  | 3.46        | 0.72  | -5.19  | -5.11  | -0.86 | -1.01 | 5.40  | 3.41  |
| Spline hazard                       | -10.96 | -11.75 | -2.66  | -5.39  | 0.65         | -3.89  | -9.45         | -10.00       | -0.43  | -2.40  | -1.60 | -4.17 | -6.54    | -6.63  | -8.98  | -10.44 | -2.77  | -4.70  | -11.00   | -11.66 | -6.96  | -8.51  | 1.35        | -0.70 | -4.24  | -4.08  | 1.17  | 0.97  | 1.36  | 0.75  |
| Spline odds                         | -8.37  | -9.50  | -0.52  | -4.19  | 4.41         | -3.18  | -6.51         | -7.37        | 1.85   | -1.19  | 4.85  | -2.64 | -5.37    | -5.76  | -5.63  | -8.91  | 3.08   | -3.86  | -3.81    | -5.62  | 0.05   | -4.18  | 8.05        | 0.77  | 2.22   | 2.01   | 7.52  | 6.16  | 4.58  | 2.33  |
| Spline normal                       | -8.30  | -9.40  | -0.54  | -4.12  | 3.91         | -3.13  | -3.63         | -4.58        | 4.00   | 0.40   | 5.94  | -1.41 | -3.45    | -4.10  | -3.36  | -7.19  | 3.66   | -3.18  | -2.13    | -3.83  | 1.44   | -2.57  | 7.65        | 1.30  | 1.75   | 1.63   | 6.16  | 5.24  | 3.33  | 1.82  |
| Extrapolation from 5 years          |        |        |        |        |              |        |               |              |        |        |       |       |          |        |        |        |        |        |          |        |        |        |             |       |        |        |       |       |       |       |
| Exponential                         | -22.72 | -23.08 | -18.36 | -19.49 | -9.30        | -10.85 | -5.08         | -5.57        | -1.42  | -3.61  | 0.72  | -2.32 | -5.98    | -6.06  | -6.05  | -7.97  | -3.21  | -5.71  | -3.54    | -4.56  | -0.59  | -2.83  | 1.26        | -1.06 | -4.41  | -4.52  | 0.89  | 0.62  | -0.61 | -0.69 |
| Weibull                             | -13.90 | -14.61 | -9.29  | -11.54 | -0.93        | -5.83  | -9.31         | -9.70        | -2.95  | -4.56  | 1.20  | -1.34 | -6.43    | -6.33  | -5.57  | -6.92  | -3.34  | -5.41  | -10.80   | -11.41 | -3.83  | -5.26  | 1.07        | -1.01 | -7.30  | -7.39  | 0.36  | 0.21  | 0.69  | 0.26  |
| Gompertz                            | 1.20   | -0.08  | 4.71   | 0.99   | 10.34        | 1.60   | -10.81        | -10.94       | -3.63  | -4.23  | 1.45  | 0.42  | -4.39    | -4.07  | -0.63  | -2.07  | 1.15   | -1.60  | -13.45   | -13.55 | -4.57  | -4.86  | 1.11        | -0.10 | -7.09  | -7.16  | -1.58 | -1.56 | 4.47  | 2.98  |
| Log-logistic                        | -10.79 | -11.90 | -5.66  | -9.17  | 4.10         | -4.61  | -6.69         | -7.41        | -0.34  | -3.09  | 7.15  | -0.26 | -5.36    | -5.55  | -3.09  | -6.01  | 2.58   | -4.51  | -4.30    | -6.06  | 2.20   | -1.90  | 8.60        | 0.69  | 0.11   | -0.34  | 8.27  | 6.69  | 5.67  | 2.65  |
| Log-normal                          | -9.37  | -10.52 | -4.40  | -8.01  | 4.69         | -4.01  | -2.80         | -3.94        | 3.37   | -0.24  | 10.33 | 1.54  | -2.91    | -3.45  | 0.01   | -4.06  | 4.90   | -3.28  | -0.60    | -3.03  | 5.98   | 0.95   | 10.74       | 2.33  | 2.50   | 1.83   | 9.13  | 7.76  | 4.71  | 2.45  |
| Generalized gamma                   | -4.53  | -5.65  | -0.41  | -3.65  | 6.33         | -0.20  | -5.35         | -5.64        | -1.25  | -2.67  | 1.59  | 0.62  | -3.29    | -3.09  | -0.79  | -3.34  | 3.49   | -1.66  | -4.18    | -4.58  | -0.43  | -1.99  | 1.77        | 0.33  | -3.81  | -3.87  | -1.91 | -2.01 | 2.94  | 2.03  |
| Spline hazard                       | -3.93  | -4.53  | -2.37  | -4.13  | 1.92         | -1.55  | -4.64         | <b>-4.88</b> | -1.72  | -2.81  | 0.10  | -0.82 | -3.31    | -3.00  | 1.03   | -0.48  | 0.35   | -1.82  | -3.00    | -3.48  | -0.08  | -1.08  | 1.28        | -0.01 | -3.19  | -3.33  | -1.46 | -1.53 | 0.36  | 0.09  |
| Spline odds                         | -3.40  | -4.15  | -1.34  | -3.65  | 3.62         | -1.42  | -3.67         | -4.08        | -0.44  | -2.19  | 3.24  | -0.37 | -2.94    | -2.78  | 1.64   | -0.40  | 2.86   | -1.65  | -0.68    | -1.73  | 2.51   | 0.14   | <b>4.61</b> | 0.63  | -0.43  | -0.70  | 1.38  | 0.91  | 1.82  | 0.86  |
| Spline normal                       | -3.43  | -4.16  | -1.43  | -3.66  | 3.22         | -1.42  | -2.99         | -3.44        | 0.33   | -1.60  | 3.16  | -0.08 | -2.44    | -2.40  | 1.97   | -0.32  | 2.73   | -1.52  | -0.63    | -1.60  | 2.55   | 0.38   | 3.83        | 0.70  | -1.14  | -1.36  | 0.24  | -0.01 | 1.13  | 0.54  |

AS, all-cause survival; RS, relative survival; RSMT, restricted mean survival time; CML, chronic myeloid leukemia.

Table B3. Difference in life expectancy (LE) or 40-year restricted mean survival time (RMST) by cancer site, age group, model, and follow-up time used for extrapolation. The LE or 40-year observed RMST (years) was the area under the Kaplan-Meier survival curve. The extrapolated values were retrieved from models fitted to each cohort with 2, 3, 5, and 10 years of follow-up data, and extrapolated to lifetime or 40 years. Difference (years) was calculated as extrapolated minus observed. Bold numbers are values mentioned in the main texts.

| Age group                           | Colon        |              |             |              |       |       | Breast |        |       |       |       |       | Melanoma |             |       |       |       |       | Prostate |       |       |             |       |       | CML   |              |       |       |       |       |
|-------------------------------------|--------------|--------------|-------------|--------------|-------|-------|--------|--------|-------|-------|-------|-------|----------|-------------|-------|-------|-------|-------|----------|-------|-------|-------------|-------|-------|-------|--------------|-------|-------|-------|-------|
|                                     | 18-59        |              | 60-69       |              | 70-99 |       | 18-59  |        | 60-69 |       | 70-99 |       | 18-59    |             | 60-69 |       | 70-99 |       | 18-59    |       | 60-69 |             | 70-99 |       | 18-59 |              | 60-69 |       | 70-99 |       |
| Survival framework                  | AS           | RS           | AS          | RS           | AS    | RS    | AS     | RS     | AS    | RS    | AS    | RS    | AS       | RS          | AS    | RS    | AS    | RS    | AS       | RS    | AS    | RS          | AS    | RS    | AS    | RS           | AS    | RS    | AS    | RS    |
| LE or 40-year observed RMST (years) | 14.38        |              | 9.16        |              | 5.04  |       | 21.63  |        | 14.52 |       | 7.39  |       | 27.26    |             | 14.67 |       | 7.29  |       | 10.59    |       | 8.49  |             | 5.02  |       | 8.16  |              | 3.50  |       | 1.90  |       |
| Extrapolation from 2 years          |              |              |             |              |       |       |        |        |       |       |       |       |          |             |       |       |       |       |          |       |       |             |       |       |       |              |       |       |       |       |
| Exponential                         | -9.93        | -9.97        | -5.12       | -5.22        | -1.88 | -1.97 | -2.47  | -3.95  | 2.59  | -1.32 | 0.70  | -0.53 | -4.98    | -6.54       | -0.72 | -3.42 | -0.57 | -1.27 | -0.18    | -1.09 | 0.83  | -0.50       | 0.31  | -0.17 | -2.59 | -2.63        | 0.07  | 0.02  | -0.27 | -0.27 |
| Weibull                             | -9.45        | -9.52        | -4.25       | -4.55        | -0.42 | -1.29 | -11.06 | -11.63 | -0.26 | -2.64 | 1.19  | -0.35 | -9.61    | -10.38      | -4.05 | -5.06 | -1.86 | -2.05 | -5.28    | -5.50 | -1.84 | -2.30       | 0.22  | -0.28 | -3.99 | -4.01        | 0.11  | 0.06  | 0.00  | -0.05 |
| Gompertz                            | 3.83         | -0.36        | 9.78        | 0.51         | 13.72 | 0.61  | -16.73 | -16.84 | -7.07 | -7.28 | 7.81  | 0.66  | -18.81   | -18.95      | -8.64 | -8.69 | -2.64 | -2.95 | -7.14    | -7.20 | -4.33 | -4.47       | 0.06  | -0.55 | -4.94 | -4.95        | -0.34 | -0.32 | 7.05  | 1.26  |
| Log-logistic                        | -5.91        | -6.93        | -0.71       | -3.12        | 2.95  | -0.86 | -6.09  | -7.81  | 4.27  | -1.39 | 5.80  | -0.05 | -5.64    | -7.62       | 0.84  | -3.73 | 1.96  | -1.50 | -1.93    | -3.32 | 2.51  | -0.85       | 4.12  | 0.11  | -0.99 | -1.44        | 3.19  | 1.59  | 1.65  | 0.39  |
| Log-normal                          | -4.96        | -6.16        | 0.10        | -2.66        | 3.34  | -0.71 | 0.73   | -2.54  | 9.62  | 0.58  | 8.84  | 0.43  | -0.03    | -3.33       | 5.85  | -1.90 | 4.05  | -0.92 | 1.82     | -1.14 | 6.41  | 0.66        | 6.02  | 0.54  | 1.00  | 0.24         | 4.18  | 2.20  | 1.37  | 0.41  |
| Generalized gamma                   | -1.60        | -3.74        | 3.53        | -1.24        | 7.43  | 0.24  | -14.23 | -14.37 | -5.21 | -4.76 | 7.70  | -0.92 | -2.41    | -4.96       | -7.61 | -6.97 | 5.02  | -0.68 | -6.32    | -6.68 | -3.92 | -3.74       | 1.95  | -0.47 | -3.92 | -3.91        | -1.02 | -0.97 | 1.98  | 0.68  |
| Spline hazard                       | -5.41        | -6.21        | -1.26       | -2.77        | 1.11  | -0.64 | -12.70 | -12.93 | -3.27 | -4.44 | 1.36  | -0.31 | -10.32   | -11.03      | -6.11 | -6.73 | -1.69 | -2.21 | -4.54    | -4.68 | -2.17 | -2.50       | 0.16  | -0.28 | -2.62 | -2.67        | -0.44 | -0.43 | 0.79  | 0.40  |
| Spline odds                         | -2.70        | -4.49        | 1.48        | -1.99        | 3.62  | -0.46 | -8.41  | -9.51  | 1.21  | -2.90 | 5.17  | -0.08 | -6.51    | -8.35       | -1.87 | -5.21 | 1.51  | -1.72 | -1.22    | -2.56 | 1.33  | -1.26       | 3.11  | 0.01  | 0.45  | -0.15        | 1.05  | 0.46  | 2.07  | 0.60  |
| Spline normal                       | -2.67        | -4.42        | 1.40        | -1.94        | 3.32  | -0.44 | -5.01  | -6.65  | 4.31  | -1.50 | 6.08  | 0.14  | -2.92    | -5.53       | 0.43  | -4.04 | 1.79  | -1.42 | -0.24    | -1.76 | 2.23  | -0.69       | 3.06  | 0.16  | 0.40  | -0.13        | 0.56  | 0.28  | 1.56  | 0.54  |
| Extrapolation from 3 years          |              |              |             |              |       |       |        |        |       |       |       |       |          |             |       |       |       |       |          |       |       |             |       |       |       |              |       |       |       |       |
| Exponential                         | -9.27        | -9.33        | -4.40       | -4.56        | -1.45 | -1.59 | -3.47  | -4.79  | 2.26  | -1.44 | 0.68  | -0.50 | -5.23    | -6.75       | -0.78 | -3.38 | -0.39 | -1.11 | -0.88    | -1.62 | 0.43  | -0.72       | 0.30  | -0.15 | -2.64 | -2.68        | 0.13  | 0.08  | -0.14 | -0.15 |
| Weibull                             | -8.06        | -8.28        | -2.75       | -3.50        | 0.05  | -0.99 | -9.48  | -9.97  | 0.26  | -2.27 | 0.90  | -0.38 | -8.09    | -9.07       | -2.73 | -4.15 | -1.00 | -1.37 | -4.26    | -4.40 | -1.41 | -1.84       | 0.24  | -0.20 | -3.46 | -3.47        | 0.18  | 0.14  | 0.06  | 0.00  |
| Gompertz                            | 4.43         | 0.11         | 10.17       | 0.77         | 10.79 | 0.36  | -14.46 | -14.54 | -4.27 | -4.40 | 1.89  | 0.02  | -14.21   | -14.39      | -5.59 | -5.41 | -0.59 | -1.06 | -5.78    | -5.81 | -3.13 | -3.18       | 0.20  | -0.18 | -3.94 | -3.93        | 0.01  | 0.02  | 3.71  | 0.71  |
| Log-logistic                        | -4.81        | -6.05        | 0.43        | -2.46        | 2.98  | -0.72 | -4.96  | -6.59  | 4.30  | -1.25 | 4.98  | -0.11 | -4.77    | -6.85       | 1.58  | -3.17 | 2.56  | -1.04 | -0.84    | -2.29 | 2.49  | -0.66       | 3.54  | 0.10  | -0.69 | -1.13        | 2.72  | 1.38  | 1.42  | 0.34  |
| Log-normal                          | -4.21        | -5.55        | 0.96        | -2.16        | 3.15  | -0.62 | -0.20  | -3.05  | 8.33  | 0.19  | 7.08  | 0.26  | -0.60    | -3.70       | 5.14  | -1.97 | 3.85  | -0.71 | 1.43     | -0.99 | 4.97  | 0.26        | 4.63  | 0.40  | 0.38  | -0.23        | 3.17  | 1.71  | 1.09  | 0.33  |
| Generalized gamma                   | -1.33        | -3.50        | 4.05        | -0.93        | 5.24  | 0.04  | -7.76  | -8.05  | 1.33  | -1.62 | 2.64  | 0.21  | -2.60    | -4.96       | 0.88  | -2.76 | 3.32  | -0.46 | -2.67    | -2.81 | -1.35 | -1.66       | 0.72  | 0.09  | -2.71 | -2.72        | -0.16 | -0.16 | 0.95  | 0.40  |
| Spline hazard                       | -3.91        | -5.05        | 1.74        | -1.33        | 1.04  | -0.49 | -6.18  | -7.00  | 2.69  | -1.03 | 0.18  | -0.63 | -4.63    | -6.13       | -0.57 | -3.05 | 0.13  | -0.72 | -2.94    | -3.15 | -1.00 | -1.47       | 0.30  | -0.08 | -2.64 | -2.63        | 0.06  | 0.04  | 0.15  | 0.07  |
| Spline odds                         | -1.98        | -3.90        | 3.39        | -1.01        | 2.98  | -0.39 | -2.73  | -4.58  | 5.55  | -0.48 | 3.28  | -0.38 | -2.63    | -4.93       | 2.71  | -2.49 | 3.03  | -0.60 | 0.28     | -1.36 | 2.15  | -0.60       | 2.56  | 0.10  | -0.36 | -0.76        | 1.49  | 0.78  | 0.88  | 0.26  |
| Spline normal                       | -2.09        | -3.93        | 3.27        | -1.00        | 2.58  | -0.39 | -0.81  | -3.06  | 7.09  | 0.02  | 3.38  | -0.22 | -0.77    | -3.59       | 4.00  | -2.04 | 2.97  | -0.51 | 0.56     | -1.05 | 2.33  | -0.36       | 2.15  | 0.15  | -0.80 | -1.07        | 0.99  | 0.61  | 0.51  | 0.19  |
| Extrapolation from 5 years          |              |              |             |              |       |       |        |        |       |       |       |       |          |             |       |       |       |       |          |       |       |             |       |       |       |              |       |       |       |       |
| Exponential                         | -7.86        | -7.99        | -3.31       | -3.59        | -0.82 | -1.02 | -3.67  | -4.91  | 2.14  | -1.39 | 0.73  | -0.35 | -4.60    | -6.12       | 0.34  | -2.60 | -0.01 | -0.79 | -1.18    | -1.82 | 0.45  | -0.62       | 0.28  | -0.10 | -2.70 | -2.73        | -0.04 | -0.07 | -0.04 | -0.05 |
| Weibull                             | -5.47        | -6.11        | -1.10       | -2.47        | 0.61  | -0.63 | -6.52  | -7.20  | 1.14  | -1.68 | 0.85  | -0.23 | -5.04    | -6.34       | 0.63  | -2.32 | -0.04 | -0.76 | -2.94    | -3.12 | -0.39 | -0.98       | 0.25  | -0.10 | -3.08 | -3.09        | -0.09 | -0.10 | 0.06  | 0.02  |
| Gompertz                            | 4.68         | 0.41         | 8.23        | 0.32         | 7.58  | 0.20  | -9.19  | -9.28  | -1.67 | 1.04  | 0.06  | -1.84 | -3.50    | 6.43        | -0.62 | 2.11  | -0.25 | -3.70 | -3.72    | -0.91 | -1.03 | 0.25        | 0.00  | -3.13 | -3.14 | -0.25        | -0.24 | 1.41  | 0.29  |       |
| Log-logistic                        | -3.11        | -4.69        | 1.28        | -1.91        | 2.92  | -0.54 | -3.06  | -4.79  | 4.38  | -0.98 | 4.12  | -0.06 | -2.90    | -5.06       | 3.65  | -1.91 | 2.86  | -0.63 | 0.07     | -1.48 | 2.80  | -0.24       | 2.74  | 0.09  | -0.92 | -1.31        | 1.65  | 0.79  | 1.13  | 0.26  |
| Log-normal                          | -2.73        | -4.37        | 1.58        | -1.72        | 2.90  | -0.47 | -0.36  | -2.83  | 6.94  | -0.13 | 5.23  | 0.16  | -0.45    | -3.31       | 5.66  | -1.38 | 3.45  | -0.50 | 1.10     | -0.87 | 4.05  | 0.22        | 3.11  | 0.25  | -0.57 | -1.01        | 1.60  | 0.85  | 0.76  | 0.22  |
| Generalized gamma                   | -0.04        | -2.50        | 3.71        | -0.85        | 3.65  | -0.01 | -2.65  | -4.03  | 2.81  | -0.94 | 1.00  | 0.04  | -0.85    | -3.07       | 5.00  | -1.18 | 2.76  | -0.30 | -0.61    | -1.34 | 0.90  | -0.35       | 0.38  | 0.04  | -2.44 | -2.49        | -0.27 | -0.27 | 0.37  | 0.17  |
| Spline hazard                       | -0.42        | -2.44        | 1.92        | -1.06        | 1.42  | -0.19 | -3.21  | -4.39  | 1.96  | -1.13 | 0.54  | -0.17 | -1.84    | -3.57       | 5.46  | -0.53 | 0.95  | -0.34 | -0.83    | -1.43 | 0.68  | -0.28       | 0.28  | 0.00  | -2.45 | -2.50        | -0.24 | -0.24 | 0.03  | 0.00  |
| Spline odds                         | 0.31         | -2.10        | 3.06        | -0.90        | 2.68  | -0.17 | -1.16  | -3.08  | 4.32  | -0.73 | 2.89  | -0.08 | -0.84    | -3.10       | 6.68  | -0.48 | 2.92  | -0.31 | 1.38     | -0.45 | 2.92  | 0.10        | 1.63  | 0.08  | -1.07 | -1.40        | 0.20  | 0.03  | 0.27  | 0.07  |
| Spline normal                       | 0.23         | -2.12        | 2.89        | -0.91        | 2.32  | -0.17 | -0.44  | -2.53  | 4.99  | -0.49 | 2.35  | -0.04 | -0.04    | -2.60       | 7.04  | -0.44 | 2.59  | -0.29 | 1.15     | -0.48 | 2.66  | 0.13        | 1.15  | 0.08  | -1.56 | -1.77        | -0.04 | -0.09 | 0.12  | 0.04  |
| Extrapolation from 10 years         |              |              |             |              |       |       |        |        |       |       |       |       |          |             |       |       |       |       |          |       |       |             |       |       |       |              |       |       |       |       |
| Exponential                         | <b>-4.53</b> | <b>-4.95</b> | -1.06       | -1.73        | -0.06 | -0.30 | -1.75  | -3.17  | 2.63  | -0.75 | 0.63  | -0.14 | -1.72    | -3.47       | 2.21  | -1.20 | 0.42  | -0.32 | -0.47    | -1.10 | 0.59  | -0.29       | 0.17  | -0.03 | -2.24 | -2.27        | -0.13 | -0.14 | 0.00  | -0.01 |
| Weibull                             | -1.23        | -2.82        | 1.30        | -1.05        | 0.72  | -0.30 | -1.40  | -2.85  | 2.60  | -0.60 | 0.62  | -0.09 | -0.27    | -2.35       | 3.32  | -0.84 | 0.57  | -0.28 | -0.78    | -1.24 | 0.39  | -0.29       | 0.14  | -0.03 | -2.24 | -2.26        | -0.14 | -0.15 | 0.01  | -0.02 |
| Gompertz                            | 4.14         | 0.49         | 6.09        | 0.22         | 2.97  | 0.15  | 2.12   | -0.24  | 3.44  | 0.01  | 0.48  | 0.03  | 3.24     | <b>6.75</b> | -0.06 | 1.41  | -0.10 | 0.26  | -0.44    | 0.53  | -0.04 | 0.07        | 0.00  | -1.50 | -1.60 | -0.16        | -0.17 | 0.11  | 0.01  |       |
| Log-logistic                        | -0.61        | -2.67        | 2.34        | -1.11        | 2.29  | -0.37 | 0.02   | -2.03  | 4.54  | -0.36 | 2.72  | -0.03 | 0.36     | -2.09       | 4.87  | -0.80 | 2.38  | -0.31 | 1.06     | -0.52 | 2.37  | -0.02       | 1.70  | 0.05  | -0.92 | -1.25        | 1.06  | 0.47  | 0.87  | 0.19  |
| Log-normal                          | -0.25        | -2.38        | 2.56        | -0.94        | 2.07  | -0.31 | 0.99   | -1.36  | 5.62  | -0.05 | 2.93  | 0.07  | 1.16     | -1.63       | 5.69  | -0.68 | 2.42  | -0.29 | 1.36     | -0.29 | 2.69  | 0.16        | 1.54  | 0.13  | -0.87 | -1.18        | 0.77  | 0.37  | 0.46  | 0.12  |
| Generalized gamma                   | 1.75         | -1.06        | 3.91        | -0.37        | 1.68  | 0.02  | 1.20   | -0.93  | 3.74  | -0.18 | 0.48  | -0.01 | 1.79     | -0.99       | 5.45  | -0.44 | 1.50  | -0.18 | 0.97     | -0.17 | 1.03  | -0.02       | 0.11  | 0.00  | -1.68 | -1.76        | -0.16 | -0.16 | 0.05  | 0.01  |
| Spline hazard                       | 2.50         | -0.13        | <b>3.37</b> | <b>-0.08</b> | 0.66  | -0.02 | 1.55   | -0.48  | 3.22  | -0.06 | 0.43  | -0.02 | 1.91     | -0.50       | 4.15  | -0.16 | 0.65  | -0.12 | 0.30     | -0.40 | 0.58  | -0.02       | 0.16  | -0.02 | -1.55 | <b>-1.62</b> | -0.12 | -0.13 | 0.00  | -0.02 |
| Spline odds                         | 2.58         | -0.13        | <b>3.74</b> | <b>-0.08</b> | 1.28  | -0.03 | 1.99   | -0.29  | 4.32  | 0.01  | 1.32  | -0.01 | 2.07     | -0.47       | 5.02  | -0.16 | 1.53  | -0.12 | 1.35     | -0.06 | 1.63  | <b>0.05</b> | 0.45  | 0.01  | -0.97 | -1.20        | -0.03 | -0.09 | 0.03  | -0.01 |
| Spline normal                       | 2.56         | -0.14        | 3.65        | <b>-0.09</b> | 1.02  | -0.03 | 2.10   | -0.22  | 4.35  | 0.04  | 0.98  | -0.01 | 2.20     | -0.43       | 5.07  | -0.16 | 1.22  | -0.12 | 1.09     | -0.11 | 1.29  | 0.04        | 0.24  | 0.00  | -1.21 | -1.37        | -0.09 | -0.12 | 0.01  | -0.02 |

AS, all-cause survival; RS, relative survival; RMST, restricted mean survival time; CML, chronic myeloid leukemia.
